# Supplementary material for: Blood glucose and insulin concentrations after alpha‐2‐agonists administration in horses with and without insulin dysregulation
Source: PubMed Central journal article supplement — J Vet Intern Med. 2020 Feb 26;34(2):902–8. doi: 10.1111/jvim.15747 (PMC7096659; doi:10.1111/jvim.15747), 2020-02-26
Supplement: JVIM-34-902-s001.pdf [file JVIM-34-902-s001.pdf]

**Supplementary Table 1.** Results of the oral sugar test (OST) or oral glucose test (OGT) and 2-step insulin sensitivity test in 7 control horses and 7 horses with insulin dysregulation (ID).

|                                                                 | Control horses     | ID horses            |
|-----------------------------------------------------------------|--------------------|----------------------|
| Serum insulin concentration<br>after an OST/OGT                 | 4 – 54 $\mu$ IU/mL | 89 – 152 $\mu$ IU/mL |
| Percentage reduction after a<br>2-step insulin sensitivity test | 52 – 74%           | 0.5 – 42%            |
